# Supplementary material
Source: PubMed Central journal article supplement (PMC7372494)
Supplement: jamaneurol-e202349-s001.pdf [file jamaneurol-e202349-s001.pdf]

## Supplementary Online Content

Murthy SB, Cho S-M, Gupta A, et al. A pooled analysis of diffusion-weighted imaging lesions in patients with acute intracerebral hemorrhage. *JAMA Neurol*. Published online July 20, 2020. doi:10.1001/jamaneurol.2020.2349

**eAppendix.** STROBE Statement—Checklist of Items That Should Be Included in Reports of Observational Studies

**eMethods.** Cohorts

**eFigure 1.** Magnetic Resonance Imaging Scan of the Brain Showing a DWI Lesion After Acute Intracerebral Hemorrhage

**eFigure 2.** Box Plots Showing Distribution of Baseline SBP Among Patients With and Without DWI Lesions

**eFigure 3.** Box Plots Showing Distribution of Change in SBP During 24 Hours Among Patients With and Without DWI Lesions

**eFigure 4.** Box Plots Showing Distribution of Baseline SBP Among Patients With and Without DWI Lesions in the ERICH Cohort Only

**eFigure 5.** Box Plots Showing Distribution of Change in SBP Over 24 hours Among Patients With and Without DWI Lesions in the ERICH Cohort Only

**eTable 1.** Characteristics of ICH Patients With and Without MRI in the Pooled Cohort

**eTable 2.** Mixed Effects Logistic Regression of Factors Associated With DWIHLs, Stratified by Hematoma Location

**eTable 3.** Multivariable Analysis of Factors Associated With DWIHLs, Stratified by Study Design (Randomized Trial vs Epidemiological Study)

**eTable 4.** Multivariable Logistic Regression of Factors Associated With DWI Lesions Excluding Patients From the i-DEF Trial

**eReferences.**

This supplementary material has been provided by the authors to give readers additional information about their work.

eAppendix. STROBE Statement—Checklist of Items That Should Be Included in Reports of Observational Studies

|                           | Item No. | Recommendation                                                                                                                                                                                                                                                                                                                                                                                                                                                         | Page No.                  |
|---------------------------|----------|------------------------------------------------------------------------------------------------------------------------------------------------------------------------------------------------------------------------------------------------------------------------------------------------------------------------------------------------------------------------------------------------------------------------------------------------------------------------|---------------------------|
| <b>Title and abstract</b> | 1        | (a) Indicate the study's design with a commonly used term in the title or the abstract                                                                                                                                                                                                                                                                                                                                                                                 | 1                         |
|                           |          | (b) Provide in the abstract an informative and balanced summary of what was done and what was found                                                                                                                                                                                                                                                                                                                                                                    | 3,4                       |
| <b>Introduction</b>       |          |                                                                                                                                                                                                                                                                                                                                                                                                                                                                        |                           |
| Background/rationale      | 2        | Explain the scientific background and rationale for the investigation being reported                                                                                                                                                                                                                                                                                                                                                                                   | 5,6                       |
| Objectives                | 3        | State specific objectives, including any prespecified hypotheses                                                                                                                                                                                                                                                                                                                                                                                                       | 5,6                       |
| <b>Methods</b>            |          |                                                                                                                                                                                                                                                                                                                                                                                                                                                                        |                           |
| Study design              | 4        | Present key elements of study design early in the paper                                                                                                                                                                                                                                                                                                                                                                                                                | 6                         |
| Setting                   | 5        | Describe the setting, locations, and relevant dates, including periods of recruitment, exposure, follow-up, and data collection                                                                                                                                                                                                                                                                                                                                        | 6,7,<br>Supplemental File |
| Participants              | 6        | (a) <i>Cohort study</i> —Give the eligibility criteria, and the sources and methods of selection of participants. Describe methods of follow-up<br><i>Case-control study</i> —Give the eligibility criteria, and the sources and methods of case ascertainment and control selection. Give the rationale for the choice of cases and controls<br><i>Cross-sectional study</i> —Give the eligibility criteria, and the sources and methods of selection of participants | 7                         |
|                           |          | (b) <i>Cohort study</i> —For matched studies, give matching criteria and number of exposed and unexposed<br><i>Case-control study</i> —For matched studies, give matching criteria and the number of controls per case                                                                                                                                                                                                                                                 |                           |
| Variables                 | 7        | Clearly define all outcomes, exposures, predictors, potential confounders, and effect modifiers. Give diagnostic criteria, if applicable                                                                                                                                                                                                                                                                                                                               | 7-9                       |
| Data sources/measurement  | 8*       | For each variable of interest, give sources of data and details of methods of assessment (measurement). Describe comparability of assessment methods if there is more than one group                                                                                                                                                                                                                                                                                   | 7-9                       |
| Bias                      | 9        | Describe any efforts to address potential sources of bias                                                                                                                                                                                                                                                                                                                                                                                                              | 10                        |
| Study size                | 10       | Explain how the study size was arrived at                                                                                                                                                                                                                                                                                                                                                                                                                              | 11, Figure 1              |

Continued on next page

|                        |     |                                                                                                                                                                                                                                                                                                           |              |
|------------------------|-----|-----------------------------------------------------------------------------------------------------------------------------------------------------------------------------------------------------------------------------------------------------------------------------------------------------------|--------------|
| Quantitative variables | 11  | Explain how quantitative variables were handled in the analyses. If applicable, describe which groupings were chosen and why                                                                                                                                                                              | 10,11        |
| Statistical methods    | 12  | (a) Describe all statistical methods, including those used to control for confounding                                                                                                                                                                                                                     | 9,10         |
|                        |     | (b) Describe any methods used to examine subgroups and interactions                                                                                                                                                                                                                                       | 9,10         |
|                        |     | (c) Explain how missing data were addressed                                                                                                                                                                                                                                                               | 9,10         |
|                        |     | (d) <i>Cohort study</i> —If applicable, explain how loss to follow-up was addressed<br><i>Case-control study</i> —If applicable, explain how matching of cases and controls was addressed<br><i>Cross-sectional study</i> —If applicable, describe analytical methods taking account of sampling strategy |              |
|                        |     | (e) Describe any sensitivity analyses                                                                                                                                                                                                                                                                     | 10           |
| <b>Results</b>         |     |                                                                                                                                                                                                                                                                                                           |              |
| Participants           | 13* | (a) Report numbers of individuals at each stage of study—eg numbers potentially eligible, examined for eligibility, confirmed eligible, included in the study, completing follow-up, and analysed                                                                                                         | 11, Figure 1 |
|                        |     | (b) Give reasons for non-participation at each stage                                                                                                                                                                                                                                                      | 11, Figure 1 |
|                        |     | (c) Consider use of a flow diagram                                                                                                                                                                                                                                                                        | Figure 1     |
| Descriptive data       | 14* | (a) Give characteristics of study participants (eg demographic, clinical, social) and information on exposures and potential confounders                                                                                                                                                                  | 11-13        |
|                        |     | (b) Indicate number of participants with missing data for each variable of interest                                                                                                                                                                                                                       | 11-13        |
|                        |     | (c) <i>Cohort study</i> —Summarise follow-up time (eg, average and total amount)                                                                                                                                                                                                                          | 11           |
| Outcome data           | 15* | <i>Cohort study</i> —Report numbers of outcome events or summary measures over time                                                                                                                                                                                                                       | 11-12        |
|                        |     | <i>Case-control study</i> —Report numbers in each exposure category, or summary measures of exposure                                                                                                                                                                                                      |              |
|                        |     | <i>Cross-sectional study</i> —Report numbers of outcome events or summary measures                                                                                                                                                                                                                        |              |
| Main results           | 16  | (a) Give unadjusted estimates and, if applicable, confounder-adjusted estimates and their precision (eg, 95% confidence interval). Make clear which confounders were adjusted for and why they were included                                                                                              | 12,13        |
|                        |     | (b) Report category boundaries when continuous variables were categorized                                                                                                                                                                                                                                 | NA           |
|                        |     | (c) If relevant, consider translating estimates of relative risk into absolute risk for a meaningful time period                                                                                                                                                                                          |              |

Continued on next page

|                          |    |                                                                                                                                                                            |        |
|--------------------------|----|----------------------------------------------------------------------------------------------------------------------------------------------------------------------------|--------|
| Other analyses           | 17 | Report other analyses done—eg analyses of subgroups and interactions, and sensitivity analyses                                                                             | 13     |
| <b>Discussion</b>        |    |                                                                                                                                                                            |        |
| Key results              | 18 | Summarise key results with reference to study objectives                                                                                                                   | 13, 14 |
| Limitations              | 19 | Discuss limitations of the study, taking into account sources of potential bias or imprecision. Discuss both direction and magnitude of any potential bias                 | 16,17  |
| Interpretation           | 20 | Give a cautious overall interpretation of results considering objectives, limitations, multiplicity of analyses, results from similar studies, and other relevant evidence | 14,15  |
| Generalisability         | 21 | Discuss the generalisability (external validity) of the study results                                                                                                      | 16,17  |
| <b>Other information</b> |    |                                                                                                                                                                            |        |
| Funding                  | 22 | Give the source of funding and the role of the funders for the present study and, if applicable, for the original study on which the present article is based              | 19     |

\*Give information separately for cases and controls in case–control studies and, if applicable, for exposed and unexposed groups in cohort and cross–sectional studies.

**Note:** An Explanation and Elaboration article discusses each checklist item and gives methodological background and published examples of transparent reporting. The STROBE checklist is best used in conjunction with this article (freely available on the Web sites of PLoS Medicine at <http://www.plosmedicine.org/>, Annals of Internal Medicine at <http://www.annals.org/>, and Epidemiology at <http://www.epidem.com/>). Information on the STROBE Initiative is available at [www.strobe-statement.org](http://www.strobe-statement.org).

## **eMethods. Cohorts.**

MISTIE III was a randomized, controlled, open-label, blinded endpoint trial that found image guided, minimally invasive surgery followed by gentle thrombolytic irrigation of the catheterized intracerebral hemorrhage clot to decrease mortality, but was neutral on the primary endpoint of improved functional outcome in patients with moderate to large ICH, compared to standard medical management.<sup>1</sup> ATACH-2 was a randomized, multicenter, open-label trial to determine the relative efficacy of intensive versus standard antihypertensive treatment initiated within 4.5 hours after symptom onset and continued for the next 24 hours in patients with spontaneous supratentorial ICH.<sup>2</sup> The trial found no difference in the primary endpoint of death or major disability at 90 days. i-DEF was a multicenter, randomized, placebo-controlled, double-blind phase 2 trial that evaluated random allocation of deferoxamine mesylate infusion versus saline (placebo) infusions in patients with ICH, and found no difference in the primary outcome of modified Rankin Scale score (mRS) of 0–2.<sup>3</sup> The ERICH study is a multicenter, prospective, case-control study of primary ICH in non-Hispanic white, non-Hispanic black, and Hispanic participants.<sup>4</sup>

**eFigure 1.** Magnetic Resonance Imaging Scan of the Brain Showing a DWI Lesion After Acute Intracerebral Hemorrhage

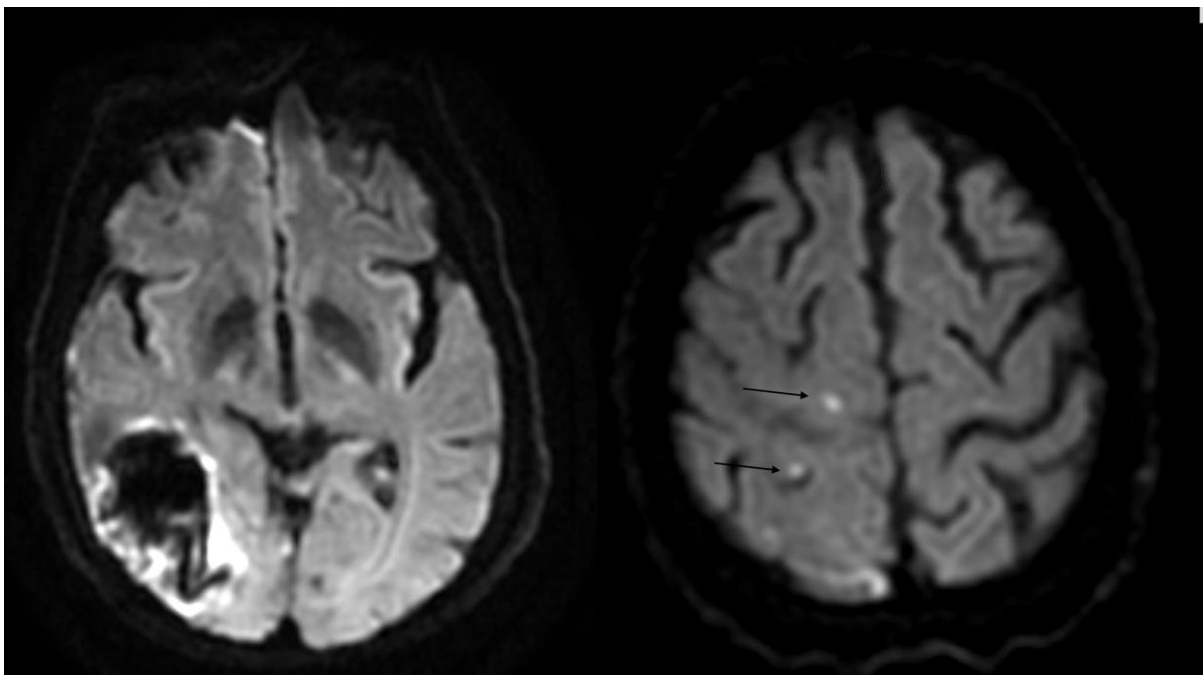

**eFigure 2.** Box Plots Showing Distribution of Baseline SBP Among Patients With and Without DWI Lesions

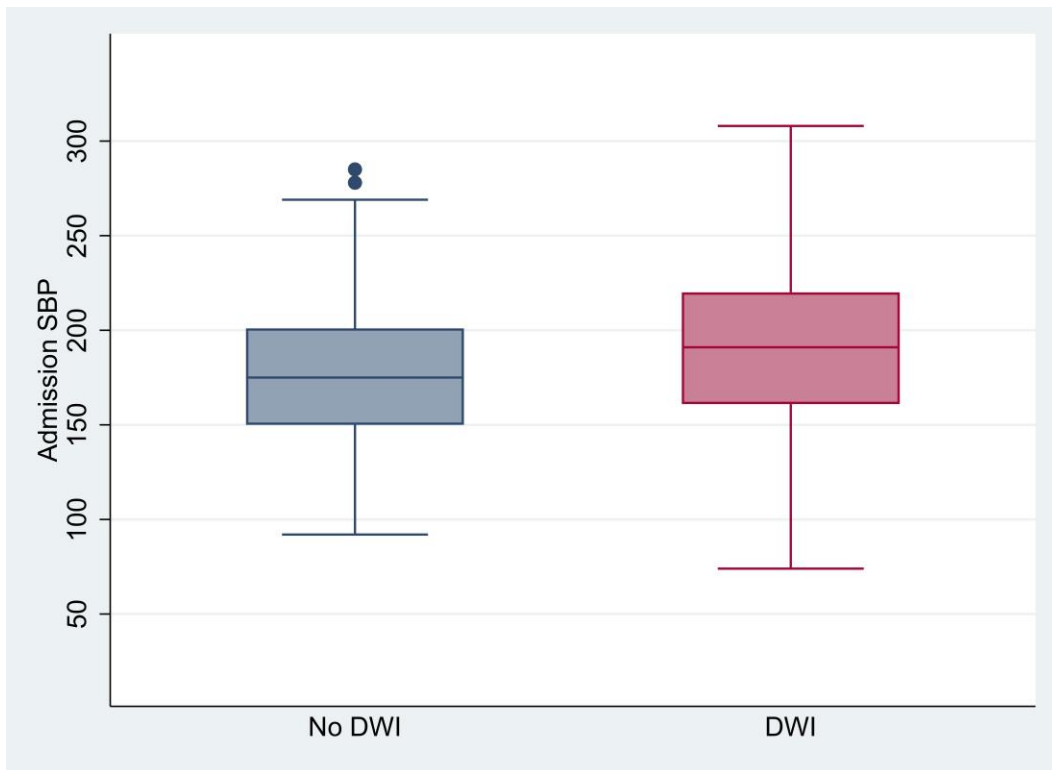

**eFigure 3.** Box Plots Showing Distribution of Change in SBP During 24 Hours Among Patients With and Without DWI Lesions

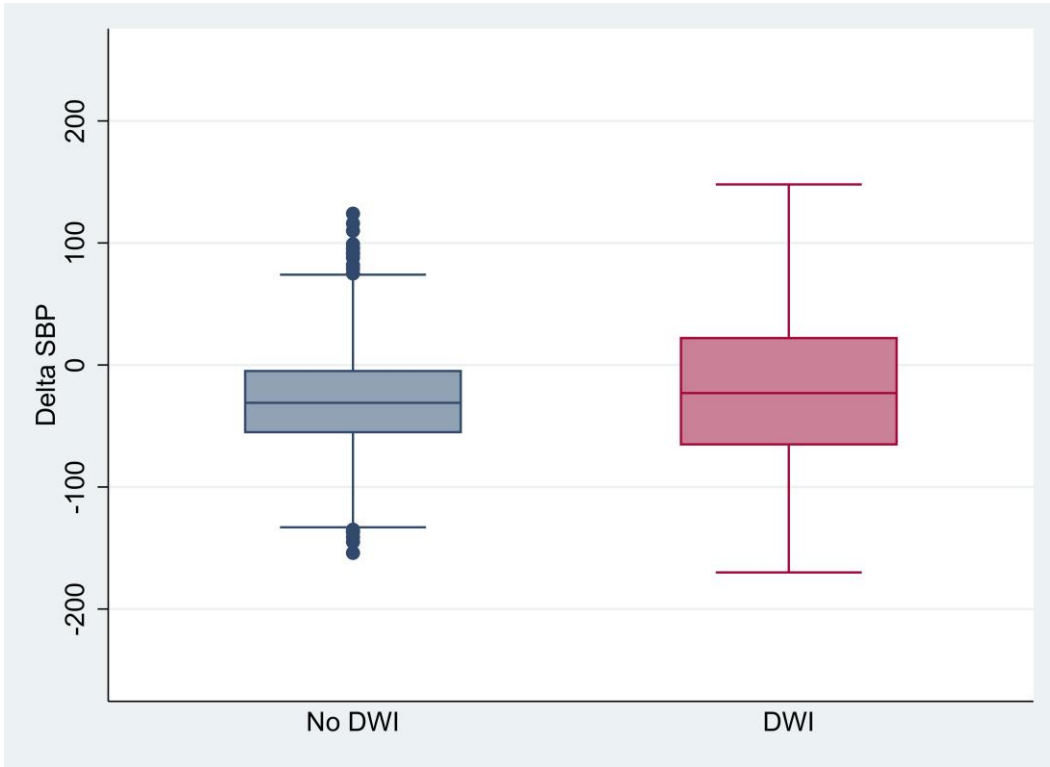



**eFigure 4.** Box Plots Showing Distribution of Baseline SBP Among Patients With and Without DWI Lesions in the ERICH Cohort Only

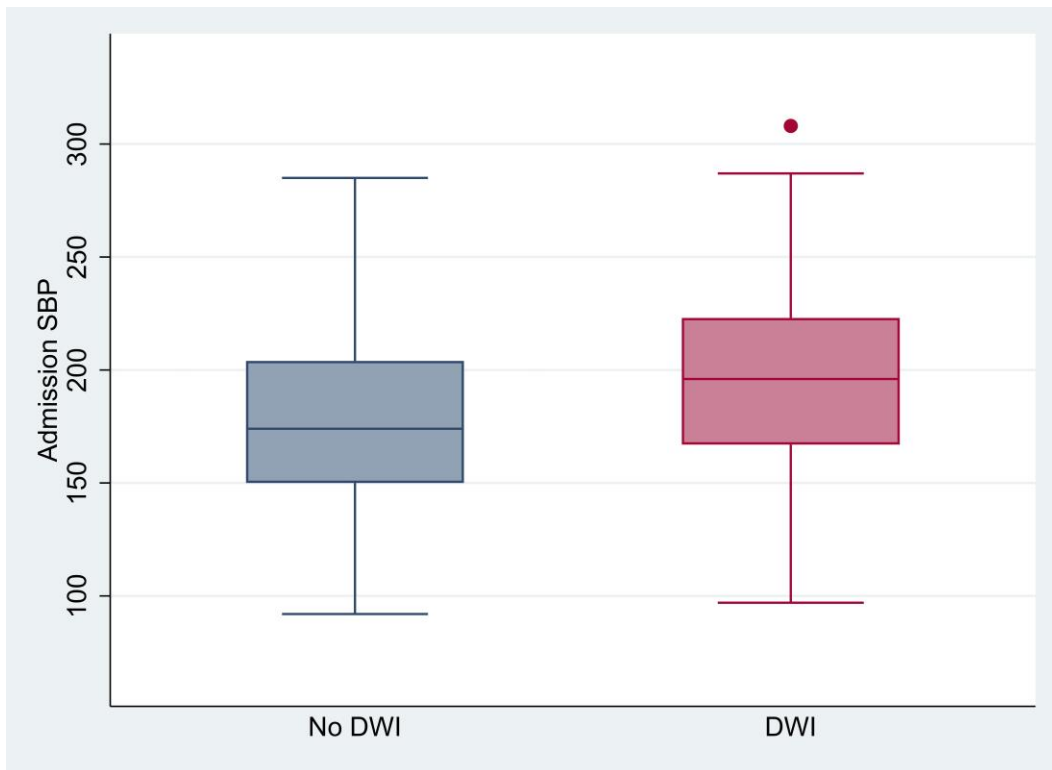

**eFigure 5.** Box Plots Showing Distribution of Change in SBP Over 24 hours Among Patients With and Without DWI Lesions in the ERICH Cohort Only

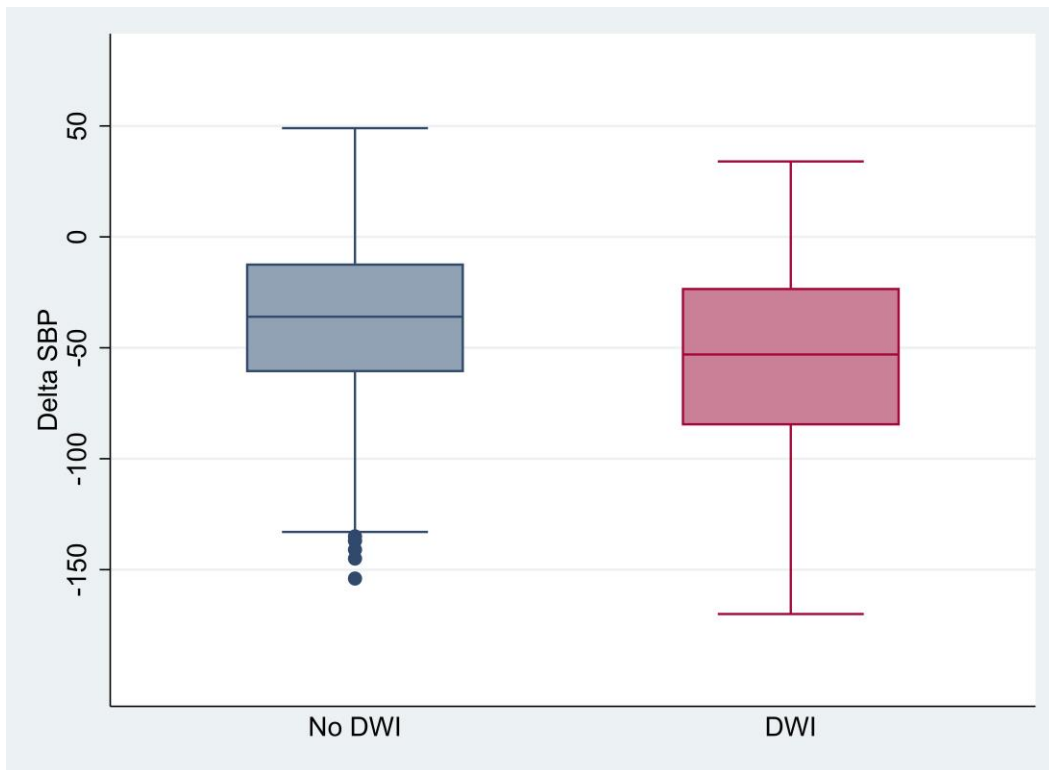

| <b>eTable 1. Characteristics of ICH Patients With and Without MRI in the Pooled Cohort</b>                                                                                                  |                              |                                  |                  |
|---------------------------------------------------------------------------------------------------------------------------------------------------------------------------------------------|------------------------------|----------------------------------|------------------|
| <b>Characteristic</b>                                                                                                                                                                       | <b>MRI Done<br/>(N=1788)</b> | <b>MRI Not Done<br/>(N=2994)</b> | <b>P value</b>   |
| Age, mean SD, y                                                                                                                                                                             | 61.2 (13.3)                  | 61.9 (13.5)                      | 0.29             |
| Male                                                                                                                                                                                        | 1044 (58.3)                  | 1827 (61.0)                      | 0.07             |
| Race                                                                                                                                                                                        |                              |                                  | <b>0.04</b>      |
| White                                                                                                                                                                                       | 751 (42.0)                   | 1073 (35.8)                      |                  |
| Black                                                                                                                                                                                       | 493 (27.6)                   | 771 (25.8)                       |                  |
| Other                                                                                                                                                                                       | 544 (30.4)                   | 1150 (38.4)                      |                  |
| Diabetes mellitus                                                                                                                                                                           | 459 (25.7)                   | 792 (26.9)                       | 0.55             |
| Hypertension                                                                                                                                                                                | 1457 (81.5)                  | 2576 (86.0)                      | <b>&lt;0.001</b> |
| Coronary artery disease                                                                                                                                                                     | 216 (12.1)                   | 410 (13.7)                       | 0.11             |
| Prior ischemic stroke / transient ischemic attack                                                                                                                                           | 261 (14.5)                   | 554 (18.5)                       | <b>&lt;0.001</b> |
| Atrial fibrillation                                                                                                                                                                         | 120 (6.7)                    | 297 (9.9)                        | <b>&lt;0.001</b> |
| Peripheral vascular disease                                                                                                                                                                 | 34 (1.9)                     | 71 (2.3)                         | 0.85             |
| ICH location                                                                                                                                                                                |                              |                                  | <b>&lt;0.001</b> |
| Lobar                                                                                                                                                                                       | 622 (34.8)                   | 677 (22.6)                       |                  |
| Deep                                                                                                                                                                                        | 1005 (56.2)                  | 2043 (68.2)                      |                  |
| Brainstem/ Cerebellum                                                                                                                                                                       | 161 (9.0)                    | 274 (9.2)                        |                  |
| ICH volume baseline (mean, SD)                                                                                                                                                              | 18.2 (9.2)                   | 24.3 (10.3)                      | <b>&lt;0.001</b> |
| IVH volume baseline (mean SD)                                                                                                                                                               | 1.5 (6.2)                    | 1.6 (9.1)                        | 0.90             |
| GCS baseline, med IQR                                                                                                                                                                       | 15 (12-15)                   | 14 (9-15)                        | <b>&lt;0.001</b> |
| Mortality at 3 months                                                                                                                                                                       | 139 (7.7)                    | 523 (17.5)                       | <b>&lt;0.001</b> |
| mRS 4-6 at 3 months                                                                                                                                                                         | 585 (32.8)                   | 1380 (46.1)                      | <b>&lt;0.001</b> |
| Abbreviations: GCS, Glasgow coma scale; ICH, intracerebral hemorrhage; IQR, interquartile range; IVH, intraventricular hemorrhage; MRI, magnetic resonance imaging; SD, standard deviation. |                              |                                  |                  |

| <b>eTable 2. Mixed Effects Logistic Regression of Factors Associated With DWIHLs, Stratified by Hematoma Location</b>                                                                                                                          |                    |                |                    |                  |
|------------------------------------------------------------------------------------------------------------------------------------------------------------------------------------------------------------------------------------------------|--------------------|----------------|--------------------|------------------|
| <b>Characteristic</b>                                                                                                                                                                                                                          | <b>Lobar ICH</b>   |                | <b>Deep ICH</b>    |                  |
|                                                                                                                                                                                                                                                | <b>OR (95% CI)</b> | <b>P value</b> | <b>OR (95% CI)</b> | <b>P value</b>   |
| Age                                                                                                                                                                                                                                            | 0.98 (0.97-1.01)   | 0.28           | 0.97 (0.96-0.99)   | <b>0.016</b>     |
| Male sex                                                                                                                                                                                                                                       | 1.52 (0.97-2.37)   | 0.07           | 1.06 (0.75-1.49)   | 0.72             |
| Race                                                                                                                                                                                                                                           |                    |                |                    |                  |
| White                                                                                                                                                                                                                                          | Reference          |                | Reference          |                  |
| Black                                                                                                                                                                                                                                          | 2.05 (1.17-3.59)   | <b>0.012</b>   | 1.55 (1.04-2.53)   | <b>0.03</b>      |
| Hispanic                                                                                                                                                                                                                                       | 1.07 (0.58-1.95)   | 0.84           | 0.87 (0.52-1.45)   | 0.59             |
| Other                                                                                                                                                                                                                                          | 0.41 (0.01-16.6)   | 0.64           | 0.62 (0.19-2.00)   | 0.43             |
| Prior anticoagulant therapy                                                                                                                                                                                                                    | 0.98 (0.45-2.13)   | 0.97           | 0.38 (0.12-1.19)   | 0.09             |
| Hematoma volume, baseline (per 10 mL)                                                                                                                                                                                                          | 1.15 (1.02-1.29)   | <b>0.024</b>   | 1.17 (1.03-1.33)   | <b>0.017</b>     |
| Presence of IVH                                                                                                                                                                                                                                | 0.45 (0.25-0.81)   | <b>0.008</b>   | 1.39 (0.95-2.03)   | 0.08             |
| Baseline SBP (per 10 mm Hg)                                                                                                                                                                                                                    | 1.12 (1.03-1.18)   | <b>0.003</b>   | 1.12 (1.06-1.20)   | <b>&lt;0.001</b> |
| Delta SBP                                                                                                                                                                                                                                      | 1.01 (0.94-1.10)   | 0.28           | 1.01 (0.97-1.10)   | 0.92             |
| Cerebral microbleeds                                                                                                                                                                                                                           | 1.71 (1.05-2.79)   | <b>0.032</b>   | 1.86 (1.26-2.74)   | <b>0.002</b>     |
| Leukoaraiosis, moderate to severe                                                                                                                                                                                                              | 1.71 (1.01-2.89)   | <b>0.047</b>   | 1.28 (0.93-1.96)   | 0.09             |
| Covariates selected based on a significance of $p < 0.1$ in the univariable analysis.<br>Abbreviations: CI, confidence interval; ICH, intracerebral hemorrhage; IVH, intraventricular hemorrhage; OR, odds ratio; SBP, systolic blood pressure |                    |                |                    |                  |

**eTable 3. Multivariable Analysis of Factors Associated With DWIHLs, Stratified by Study Design (Randomized Trial vs Epidemiological Study)**

| Characteristic                                                                                                                                                                                                                                                                                                                                                                                                                                                        | ATACH-2, MISTIE 3, and I-DEF |                  | ERICH Only       |                  |
|-----------------------------------------------------------------------------------------------------------------------------------------------------------------------------------------------------------------------------------------------------------------------------------------------------------------------------------------------------------------------------------------------------------------------------------------------------------------------|------------------------------|------------------|------------------|------------------|
|                                                                                                                                                                                                                                                                                                                                                                                                                                                                       | OR (95% CI)                  | P value          | OR (95% CI)      | P value          |
| Age                                                                                                                                                                                                                                                                                                                                                                                                                                                                   | 0.99 (0.97-1.01)             | 0.43             | 0.97 (0.96-0.99) | <b>0.004</b>     |
| Male sex                                                                                                                                                                                                                                                                                                                                                                                                                                                              | 1.25 (0.77-2.02)             | 0.35             | 1.32 (0.95-1.82) | 0.10             |
| Race                                                                                                                                                                                                                                                                                                                                                                                                                                                                  |                              |                  |                  |                  |
| White                                                                                                                                                                                                                                                                                                                                                                                                                                                                 | Reference                    |                  | Reference        |                  |
| Black                                                                                                                                                                                                                                                                                                                                                                                                                                                                 | 2.73 (1.42-5.24)             | <b>0.002</b>     | 1.62 (1.10-2.39) | <b>0.016</b>     |
| Other                                                                                                                                                                                                                                                                                                                                                                                                                                                                 | 1.08 (0.65-1.81)             | 0.75             | 0.88 (0.57-1.35) | 0.56             |
| Prior anticoagulant therapy                                                                                                                                                                                                                                                                                                                                                                                                                                           | 0.64 (0.21-1.93)             | 0.43             | 0.68 (0.35-1.35) | 0.27             |
| Hematoma volume, baseline (per 10 mL)                                                                                                                                                                                                                                                                                                                                                                                                                                 | 1.17 (1.03-1.33)             | <b>0.015</b>     | 1.08 (0.98-1.20) | 0.10             |
| Presence of IVH                                                                                                                                                                                                                                                                                                                                                                                                                                                       | 1.16 (0.70-1.93)             | 0.55             | 1.10 (0.78-1.53) | 0.59             |
| Baseline SBP (per 10 mm Hg)                                                                                                                                                                                                                                                                                                                                                                                                                                           | 1.14 (1.06-1.22)             | <b>&lt;0.001</b> | 1.15 (1.06-1.28) | <b>0.001</b>     |
| Delta SBP <sup>1</sup>                                                                                                                                                                                                                                                                                                                                                                                                                                                | ----                         |                  | 1.00 (0.99-1.01) | 0.37             |
| Cerebral microbleeds                                                                                                                                                                                                                                                                                                                                                                                                                                                  | 1.76 (1.18-2.84)             | <b>0.02</b>      | 1.93 (1.38-2.72) | <b>&lt;0.001</b> |
| Leukoaraiosis, moderate to severe                                                                                                                                                                                                                                                                                                                                                                                                                                     | 1.45 (0.85-2.45)             | 0.17             | 1.55 (1.08-2.23) | <b>0.018</b>     |
| Treatment arm assignment                                                                                                                                                                                                                                                                                                                                                                                                                                              | 1.19 (0.72-1.96)             | 0.49             | Not Applicable   |                  |
| Covariates selected based on a significance of $p < 0.1$ in the univariable analysis<br>Abbreviations: CI, confidence interval; ICH, intracerebral hemorrhage; IVH, intraventricular hemorrhage; OR, odds ratio; SBP, systolic blood pressure<br><sup>1</sup> indicates significant interaction between admission SBP and delta SBP ( $p = 0.01$ ) for the analysis of the 3 trials. No such interaction was noted in the analysis of the ERICH cohort ( $p = 0.65$ ) |                              |                  |                  |                  |

| <b>eTable 4. Multivariable Logistic Regression of Factors Associated With DWI Lesions Excluding Patients From the i-DEF Trial</b>                     |                    |                  |
|-------------------------------------------------------------------------------------------------------------------------------------------------------|--------------------|------------------|
| <b>Characteristic</b>                                                                                                                                 | <b>OR (95% CI)</b> | <b>P value</b>   |
| Age                                                                                                                                                   | 0.98 (0.97-0.99)   | <b>0.004</b>     |
| Male sex                                                                                                                                              | 1.33 (1.01-1.75)   | <b>0.04</b>      |
| Race                                                                                                                                                  | Reference          |                  |
| White                                                                                                                                                 |                    |                  |
| Black                                                                                                                                                 | 1.64 (1.17-2.30)   | <b>0.004</b>     |
| Hispanic                                                                                                                                              | 0.89 (-0.62-1.29)  | 0.54             |
| Other                                                                                                                                                 | 0.64 (0.22-1.88)   | 0.42             |
| Prior anticoagulant therapy                                                                                                                           | 0.63 (0.35-1.13)   | 0.12             |
| Hematoma volume, baseline (per 10 mL)                                                                                                                 | 1.12 (1.02-1.22)   | <b>0.008</b>     |
| Presence of IVH                                                                                                                                       | 1.07 (0.79-1.43)   | 0.66             |
| Hematoma location                                                                                                                                     | Reference          |                  |
| Lobar                                                                                                                                                 |                    |                  |
| Deep                                                                                                                                                  | 0.81 (0.58-1.11)   | 0.19             |
| Brainstem or cerebellar                                                                                                                               | 1.10 (0.65-1.82)   | 0.73             |
| Baseline SBP (per 10 mm Hg)                                                                                                                           | 1.13 (1.07-1.18)   | <b>&lt;0.001</b> |
| Delta SBP <sup>1</sup>                                                                                                                                | ----               | ---              |
| Presence of cerebral microbleeds                                                                                                                      | 1.85 (1.39-2.46)   | <b>&lt;0.001</b> |
| Leukoaraiosis, moderate to severe                                                                                                                     | 1.59 (1.17-2.17)   | <b>0.003</b>     |
| Covariates selected based on a significance of $p < 0.1$ in the univariable analysis                                                                  |                    |                  |
| Abbreviations: CI, confidence interval; ICH, intracerebral hemorrhage; IVH, intraventricular hemorrhage; OR, odds ratio; SBP, systolic blood pressure |                    |                  |
| <sup>1</sup> indicates significant interaction between admission SBP and delta SBP ( $p = 0.03$ )                                                     |                    |                  |

## References

1. Hanley DF, Thompson RE, Rosenblum M, et al. Efficacy and safety of minimally invasive surgery with thrombolysis in intracerebral haemorrhage evacuation (MISTIE III): a randomised, controlled, open-label, blinded endpoint phase 3 trial. *Lancet*. 2019;393(10175):1021-1032.
2. Qureshi AI, Palesch YY, Barsan WG, et al. Intensive Blood-Pressure Lowering in Patients with Acute Cerebral Hemorrhage. *N Engl J Med*. 2016;375(11):1033-1043.
3. Selim M, Foster LD, Moy CS, et al. Deferoxamine mesylate in patients with intracerebral haemorrhage (i-DEF): a multicentre, randomised, placebo-controlled, double-blind phase 2 trial. *Lancet Neurol*. 2019;18(5):428-438.
4. Woo D, Rosand J, Kidwell C, et al. The Ethnic/Racial Variations of Intracerebral Hemorrhage (ERICH) study protocol. *Stroke*. 2013;44(10):e120-125.
